# Supplementary material
Source: Springer Nature journal article supplement (https://www.springermedizin.de/resource/supplementary/12881_2012_980_MOESM4_ESM.pdf/9451734)

R751

C719

C706

K353

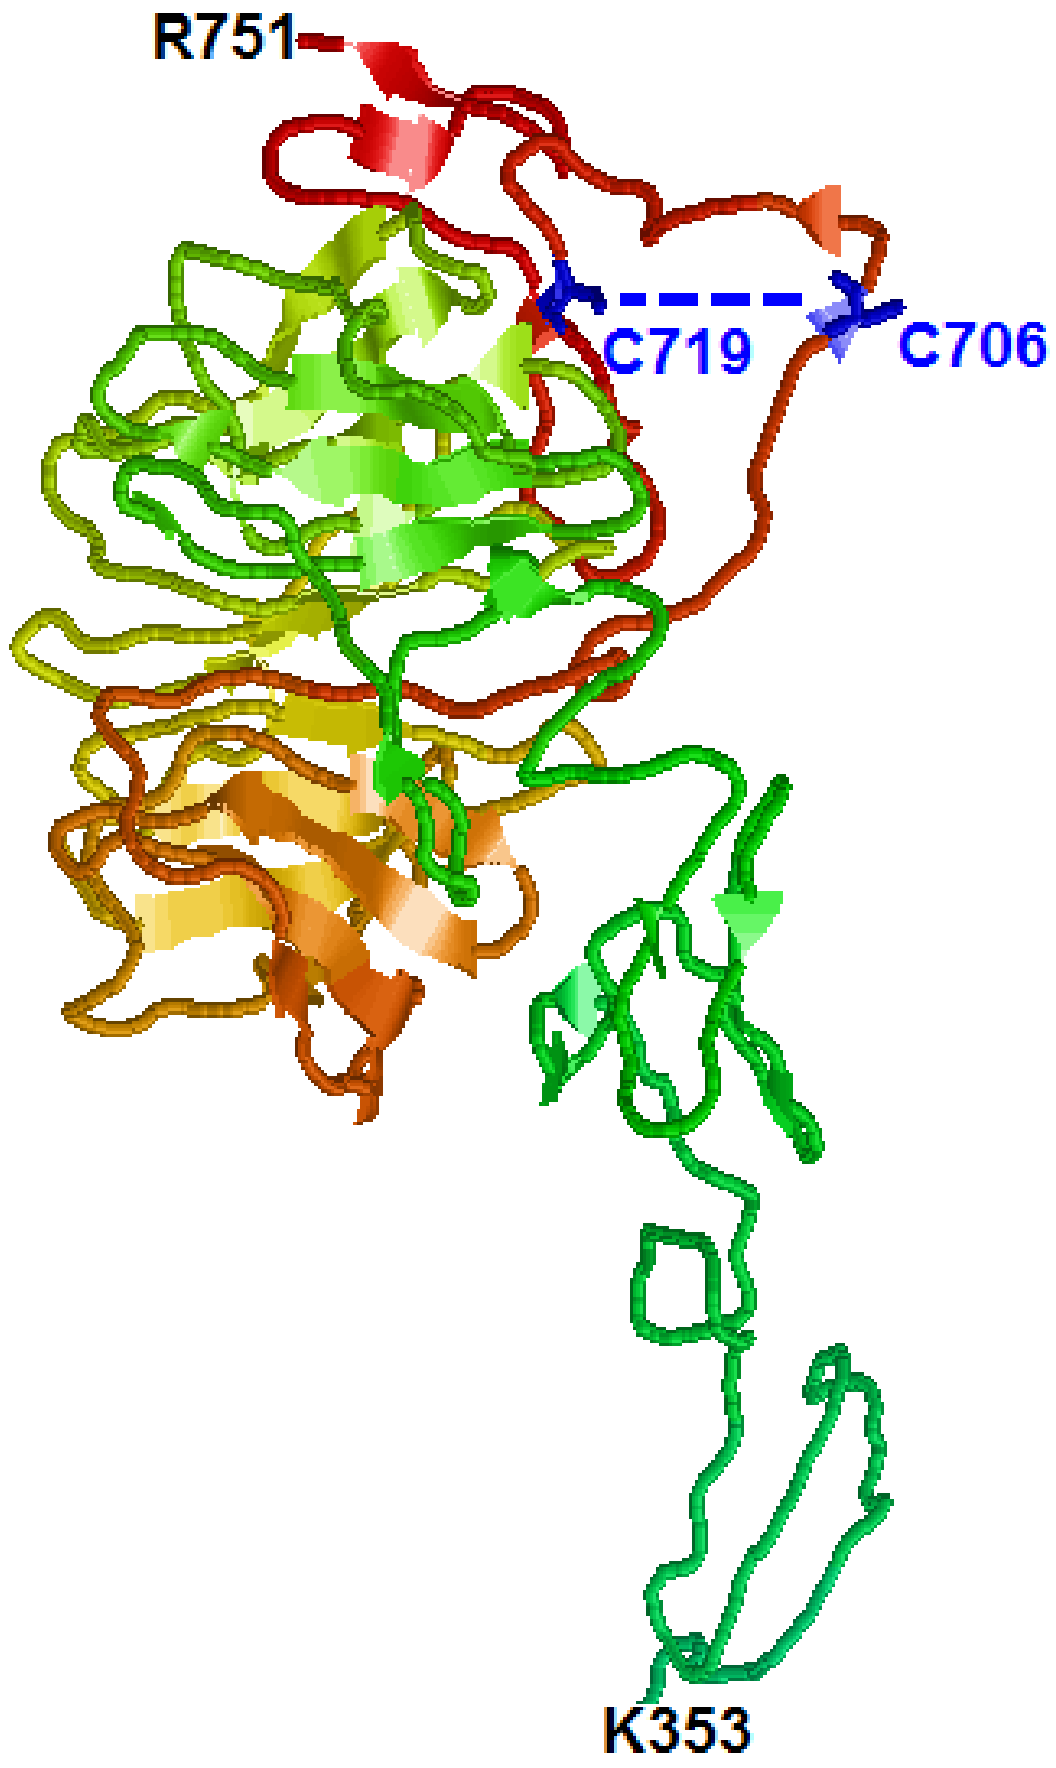

Supplement: MOESM4 [file 9451734]
